# Supplementary material for: Can transparency undermine peer review? A simulation model of scientist behavior under open peer review
Source: Oxford University Press journal article supplement (doi:10.1093/scipol/scac027), 2022-05-03
Supplement: scac027_supp.zip [file scac027_supp.zip]

Archive with 1 entries (1 files):
- spp-2020-196-File010.pdf
